# Supplementary material
Source: PubMed Central journal article supplement (PMC8752149)
Supplement: aem.01583-21-s0001.pdf [file aem.01583-21-s0001.pdf]

## Supplemental Information

### **Expanding the *Burkholderia pseudomallei* complex with the addition of two novel species: *Burkholderia mayonis* sp. nov. and *Burkholderia savannae* sp. nov.**

Running Title: *Burkholderia mayonis* and *B. savannae* sp. nov.

Carina M. Hall,<sup>a</sup> Anthony L. Baker,<sup>b</sup> Jason W. Sahl,<sup>a</sup> Mark Mayo,<sup>c</sup> Holger C. Scholz,<sup>d</sup> Mirjam Kaestli,<sup>c</sup> James Schupp,<sup>c</sup> Madison Martz,<sup>a</sup> Erik W. Settles,<sup>a</sup> Joseph D. Busch,<sup>a</sup> Lindsay Sidak-Loftis,<sup>a</sup> Astrid Thomas,<sup>d</sup> Lisa Kreutzer,<sup>d</sup> Enrico Georgi,<sup>d</sup> Herbert P. Schweizer,<sup>a</sup> Jeffrey M. Warner,<sup>b</sup> Paul Keim,<sup>a</sup> Bart J. Currie,<sup>b</sup> David M. Wagner<sup>a#</sup>

<sup>a</sup>Pathogen and Microbiome Institute, Northern Arizona University, Flagstaff, Arizona, USA

<sup>b</sup>Discipline of Biomedicine and Australian Institute of Tropical Health and Medicine, James Cook University, Townsville, Australia

<sup>c</sup>Menzies School of Health Research, Darwin, Northern Territory, Australia

<sup>d</sup>Bundeswehr Institute of Microbiology, Munich, Germany

<sup>e</sup>Translational Genetics and Genomics, Flagstaff, Arizona, USA

## MALDI-TOF

Preparations of bacterial isolates (BDU6<sup>T</sup>, BDU8, MSMB266<sup>T</sup>, MSMB852, BDU18, BDU19) for matrix-assisted laser-desorption/ionization time-of-flight mass spectrometry (MALDI-TOF MS) were done according to the ethanol/formic acid extraction protocol recommended by the manufacturer (Bruker Daltonics) and as previously described (1). Briefly, strains were grown on Columbia agar supplemented with 5% sheep blood then a loopful of bacterial material was evenly dissolved in 300 µl analytical grade water, and 900 µl pure ethanol was added. The cell suspension was centrifuged at 13,000 × g for 2 minutes and the supernatant was discarded. The centrifugation was repeated, and the residual ethanol was discarded. The pellet was air dried and thoroughly resuspended in 5-50 µl 70% formic acid depending on the size, and, finally, an equal volume of acetonitrile was added. After centrifugation at 13,000 × g for 2 minutes, 1 µl of the supernatant was transferred to the MALDI target plate. After air-drying at room temperature 1 µl of matrix solution (saturated solution of α-cyano-hydroxy-cinnamic acid in 50% aqueous acetonitrile containing 2.5% trifluoroacetic acid) per spot was applied. MALDI-TOF MS was conducted using a Microflex LT mass spectrometer (Bruker Daltonics) equipped with a nitrogen laser. All spectra were recorded in linear, positive ion mode across a mass/charge ratio (m/z) of 2,000 to 20,000. The acceleration voltage was 20 kV. Spectra were collected as a sum of 240 shots across a spot. Main spectra were calculated from 8 spectra per strain and used for construction of a score oriented dendrogram by using the BioTyper software (version 2.3, Bruker Daltonics). In these analyses *B. mayonis* sp. nov. and *B. savannae* sp. nov. strains grouped together with other members of the *B. pseudomallei* complex and with *B. ubonensis* from the *B. cepacia* complex and (Fig. S4).

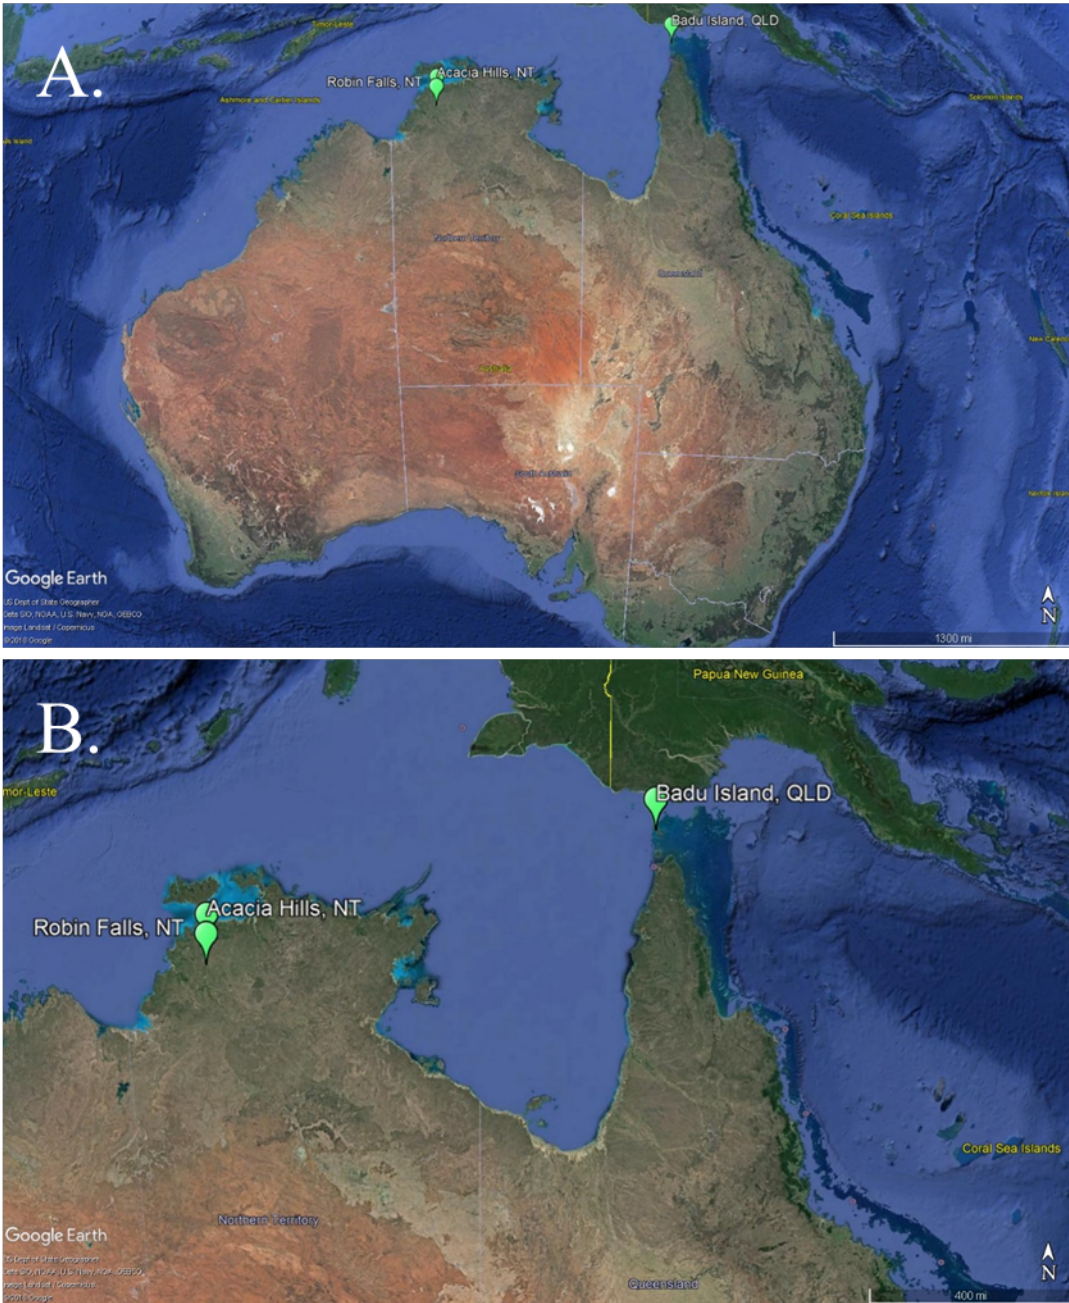

Fig. S1. Geographic origin of *B. mayonis* sp. nov. (Badu Island) and *B. savannae* sp. nov. (Acacia Hills, Badu Island, and Robin Falls) isolates from the environment (Google Earth, US Dept of State Geographer, Data SIO, NOAA, US Navy, NGA, GEBCO, Image Landsat/Copernicus, ©2018 Google). Panel B is a zoomed in version of panel A.

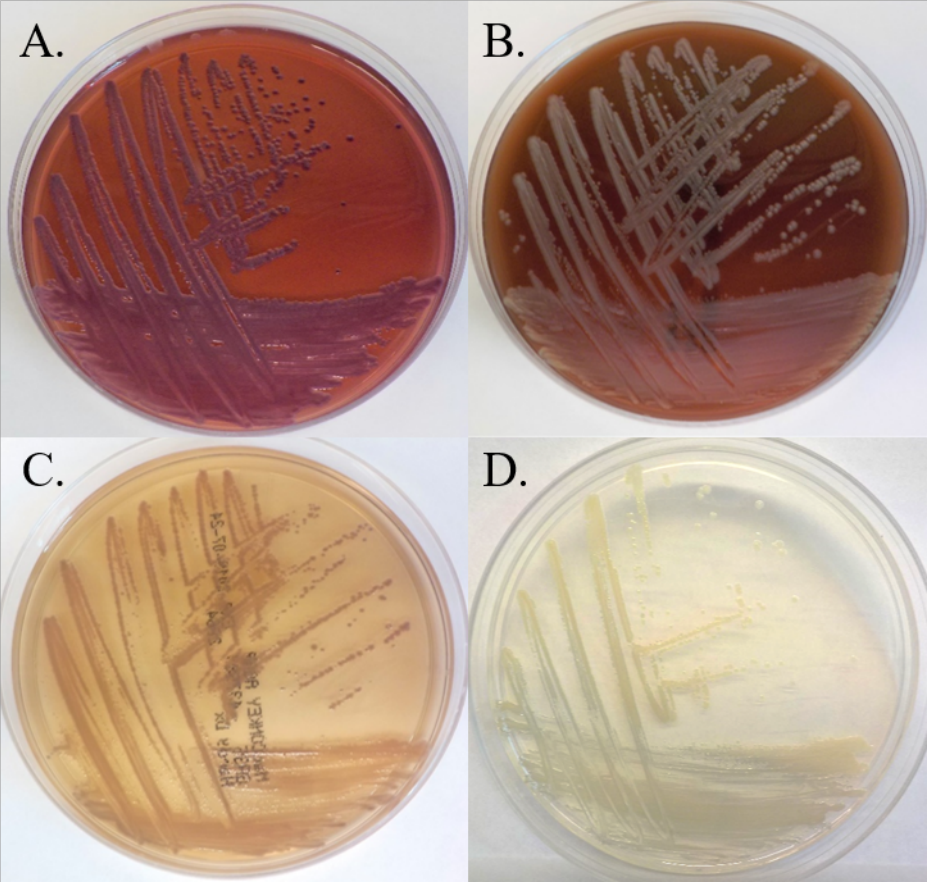

Fig. S2. *B. mayonis* sp. nov. (BDU6<sup>T</sup>) on four media types after 96 hours of incubation at 25°C. Panels A. Ashdown's Agar; B. Columbia Blood Agar; C. MacConkey Agar; D. Luria-Bertani Agar.

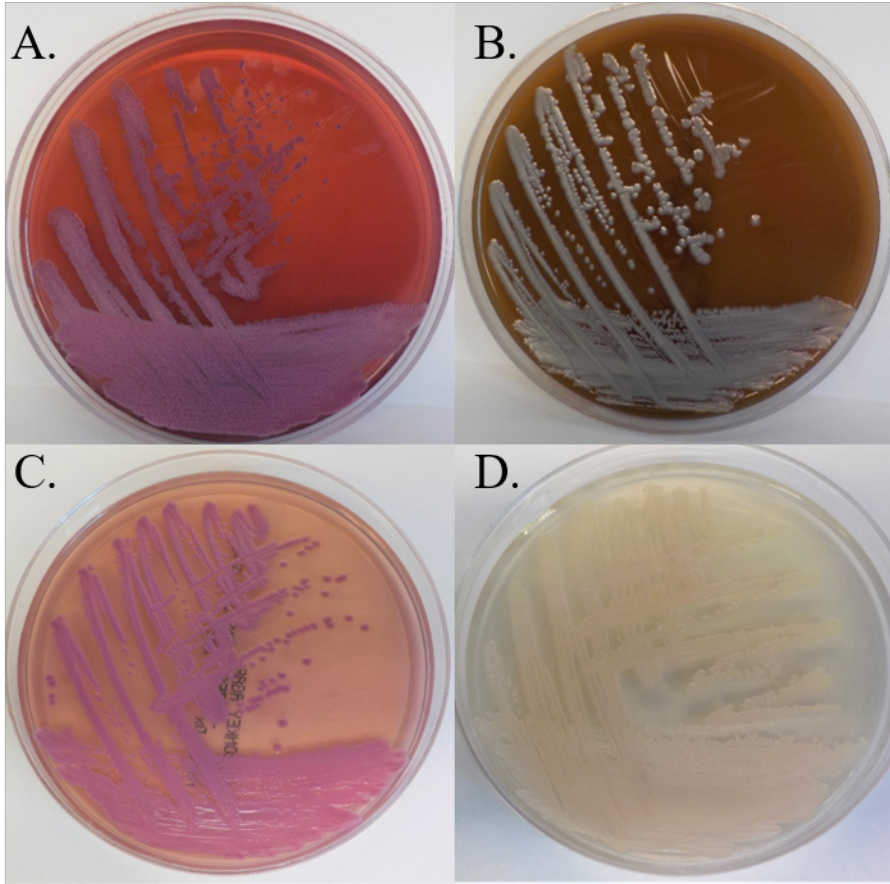

Fig. S3. *B. savannae* sp. nov. (MSMB266<sup>T</sup>) on four media types after 96 hours of incubation at 25°C. Panels A. Ashdown's Agar; B. Columbia Blood Agar; C. MacConkey Agar; D. Luria-Bertani Agar.



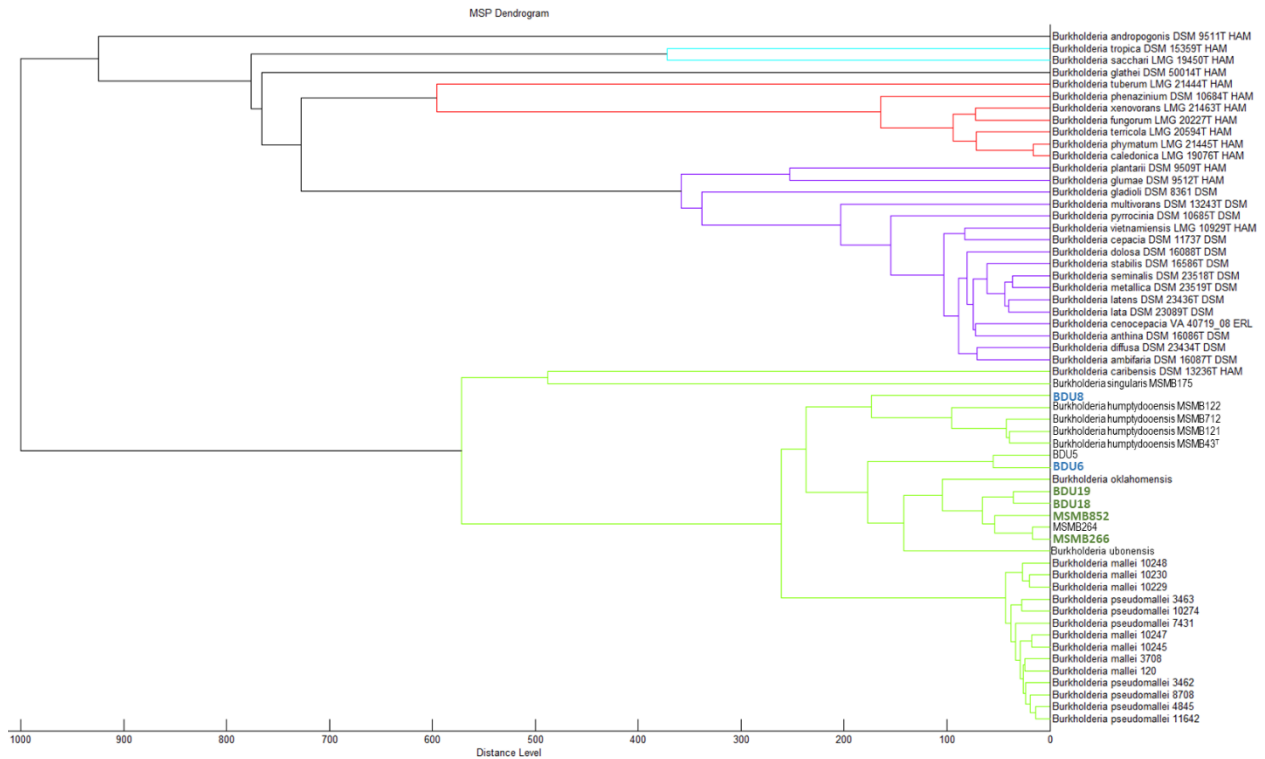

Fig. S4. Dendrogram demonstrating strain relatedness revealed by MALDI – TOF analysis. *B. mayonis* sp. nov. strains are in blue text while *B. savannae* sp. nov. strains are in green text. Although BDU5 was not described in this study the MALDI-TOF analysis suggests that this may be an additional *B. mayonis* sp. nov. strain and this is further supported by BDU5, BDU6, and BDU8 all reported as putative species 2 in a previous study (2). MSMB264 was also not described in this study but the MALDI-TOF analysis suggests that it may be an additional *B. savannae* sp. nov. strain.

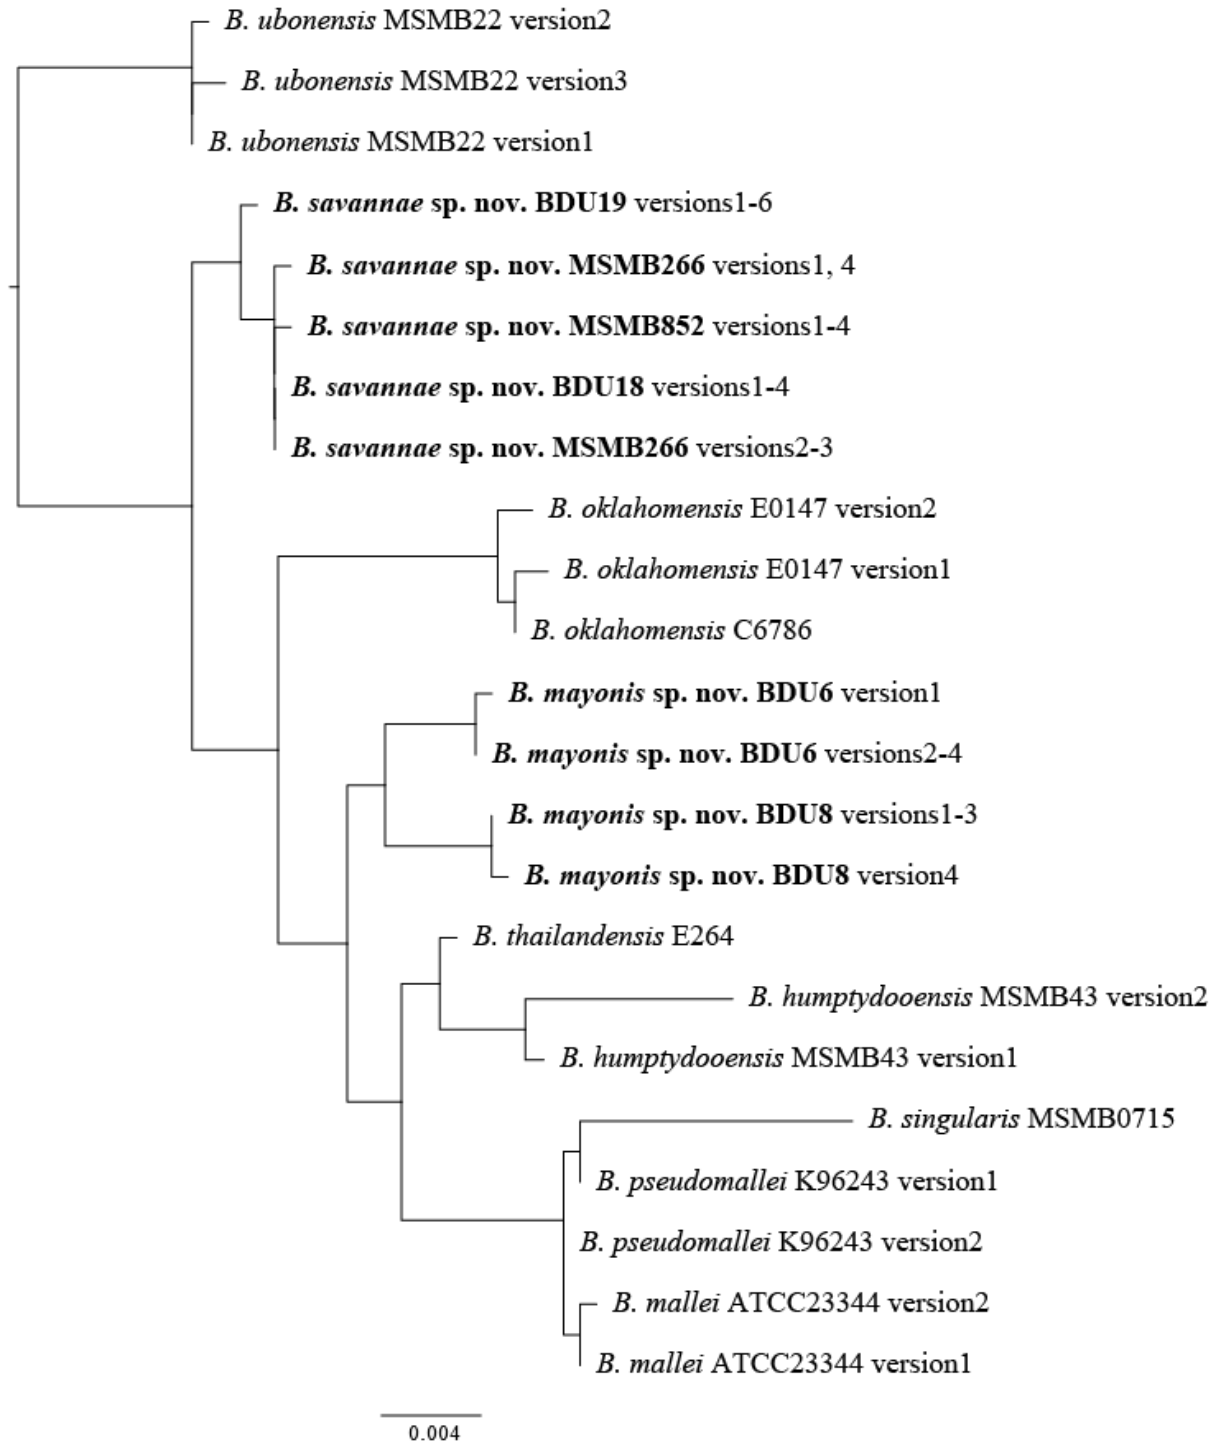

Fig. S5. 16S maximum likelihood phylogeny using unique copies of 16S from *B. mayonis* sp. nov. and *B. savannae* sp. nov. strains, bolded (1,529 bp and 23 sequences). Rooted with *B. ubonensis*.

Table S1. The blast score ratios of three virulence genes, *bimA*, the type III secretion system (T3SS), and the type VI secretion system 5 (T6SS-5) across the *B. mayonis* sp. nov. and *B. savannae* sp. nov. strains. The blast score ratios are show where “0” (white) represents the locus fully absent and “1” (red) represents the locus fully present for that strain.

| Locus    | Region | <i>B. mayonis</i> |                   | <i>B. savannae</i>   |       |       |         | <i>B. pseudomallei</i> |       |
|----------|--------|-------------------|-------------------|----------------------|-------|-------|---------|------------------------|-------|
|          |        | BDU8              | BDU6 <sup>T</sup> | MSMB266 <sup>T</sup> | BDU19 | BDU18 | MSMB852 | K96243                 | 1026b |
| BPSS1492 | bimA   | 0.30              | 0.19              | 0.31                 | 0.19  | 0.19  | 0.19    | 1.00                   | 1.00  |
| BPSS1390 | T3SS   | 0.52              | 0.19              | 0.53                 | 0.53  | 0.52  | 0.53    | 1.00                   | 1.00  |
| BPSS1391 | T3SS   | 0.34              | 0.05              | 0.33                 | 0.33  | 0.33  | 0.33    | 1.00                   | 1.00  |
| BPSS1392 | T3SS   | 0.47              | 0.19              | 0.45                 | 0.45  | 0.45  | 0.45    | 1.00                   | 1.00  |
| BPSS1393 | T3SS   | 0.27              | 0.12              | 0.29                 | 0.28  | 0.29  | 0.28    | 1.00                   | 1.00  |
| BPSS1394 | T3SS   | 0.74              | 0.49              | 0.74                 | 0.74  | 0.74  | 0.74    | 1.00                   | 1.00  |
| BPSS1395 | T3SS   | 0.35              | 0.07              | 0.36                 | 0.36  | 0.36  | 0.36    | 1.00                   | 1.00  |
| BPSS1396 | T3SS   | 0.17              | 0.07              | 0.18                 | 0.18  | 0.18  | 0.18    | 1.00                   | 1.00  |
| BPSS1397 | T3SS   | 0.54              | 0.26              | 0.53                 | 0.53  | 0.53  | 0.53    | 1.00                   | 1.00  |
| BPSS1398 | T3SS   | 0.26              | 0.00              | 0.28                 | 0.28  | 0.28  | 0.28    | 1.00                   | 0.99  |
| BPSS1399 | T3SS   | 0.30              | 0.00              | 0.28                 | 0.29  | 0.29  | 0.29    | 1.00                   | 1.00  |
| BPSS1400 | T3SS   | 0.50              | 0.24              | 0.49                 | 0.49  | 0.50  | 0.49    | 1.00                   | 1.00  |
| BPSS1401 | T3SS   | 0.67              | 0.36              | 0.68                 | 0.68  | 0.67  | 0.68    | 1.00                   | 1.00  |
| BPSS1402 | T3SS   | 0.21              | 0.08              | 0.21                 | 0.21  | 0.21  | 0.21    | 1.00                   | 0.99  |
| BPSS1403 | T3SS   | 0.23              | 0.00              | 0.21                 | 0.21  | 0.21  | 0.21    | 1.00                   | 1.00  |
| BPSS1404 | T3SS   | 0.79              | 0.46              | 0.79                 | 0.79  | 0.79  | 0.79    | 1.00                   | 1.00  |
| BPSS1405 | T3SS   | 0.60              | 0.34              | 0.60                 | 0.60  | 0.60  | 0.60    | 1.00                   | 1.00  |
| BPSS1406 | T3SS   | 0.09              | 0.07              | 0.11                 | 0.11  | 0.12  | 0.12    | 1.00                   | 0.96  |
| BPSS1407 | T3SS   | 0.28              | 0.07              | 0.30                 | 0.30  | 0.30  | 0.31    | 1.00                   | 0.99  |
| BPSS1408 | T3SS   | 0.32              | 0.20              | 0.32                 | 0.32  | 0.33  | 0.32    | 1.00                   | 1.00  |
| BPSS1409 | T3SS   | 0.00              | 0.18              | 0.16                 | 0.18  | 0.18  | 0.17    | 1.00                   | 0.96  |
| BPSS1410 | T3SS   | 0.73              | 0.00              | 0.72                 | 0.72  | 0.72  | 0.72    | 1.00                   | 1.00  |
| BPSS0091 | T6SS-5 | 0.21              | 0.29              | 0.81                 | 0.81  | 0.81  | 0.81    | 1.00                   | 0.99  |



|          |        |      |      |      |      |      |      |      |      |
|----------|--------|------|------|------|------|------|------|------|------|
| BPSS0092 | T6SS-5 | 0.28 | 0.41 | 0.91 | 0.90 | 0.91 | 0.90 | 1.00 | 1.00 |
| BPSS0093 | T6SS-5 | 0.28 | 0.32 | 0.89 | 0.89 | 0.89 | 0.89 | 1.00 | 1.00 |
| BPSS0094 | T6SS-5 | 0.00 | 0.26 | 0.85 | 0.84 | 0.84 | 0.84 | 1.00 | 1.00 |
| BPSS0095 | T6SS-5 | 0.08 | 0.00 | 0.77 | 0.77 | 0.77 | 0.77 | 1.00 | 0.99 |
| BPSS0096 | T6SS-5 | 0.06 | 0.07 | 0.83 | 0.84 | 0.84 | 0.84 | 1.00 | 0.99 |
| BPSS0097 | T6SS-5 | 0.76 | 0.76 | 0.98 | 0.98 | 0.98 | 0.98 | 1.00 | 1.00 |
| BPSS0098 | T6SS-5 | 0.86 | 0.86 | 0.99 | 0.99 | 0.99 | 0.99 | 1.00 | 1.00 |
| BPSS0099 | T6SS-5 | 0.69 | 0.70 | 0.96 | 0.96 | 0.96 | 0.96 | 1.00 | 0.99 |
| BPSS0100 | T6SS-5 | 0.44 | 0.45 | 0.89 | 0.89 | 0.89 | 0.89 | 1.00 | 0.99 |
| BPSS0101 | T6SS-5 | 0.64 | 0.64 | 0.99 | 0.99 | 0.99 | 0.99 | 1.00 | 1.00 |
| BPSS0102 | T6SS-5 | 0.39 | 0.39 | 0.93 | 0.93 | 0.93 | 0.93 | 1.00 | 1.00 |
| BPSS0103 | T6SS-5 | 0.44 | 0.44 | 0.91 | 0.91 | 0.91 | 0.91 | 1.00 | 1.00 |
| BPSS0104 | T6SS-5 | 0.00 | 0.00 | 0.86 | 0.86 | 0.86 | 0.86 | 1.00 | 0.99 |
| BPSS0105 | T6SS-5 | 0.28 | 0.28 | 0.85 | 0.86 | 0.86 | 0.85 | 1.00 | 0.97 |
| BPSS0106 | T6SS-5 | 0.24 | 0.20 | 0.82 | 0.82 | 0.82 | 0.82 | 1.00 | 1.00 |
| BPSS0108 | T6SS-5 | 0.00 | 0.00 | 0.64 | 0.64 | 0.64 | 0.64 | 1.00 | 0.99 |
| BPSS0109 | T6SS-5 | 0.00 | 0.00 | 0.48 | 0.47 | 0.47 | 0.47 | 1.00 | 1.00 |
| BPSS0110 | T6SS-5 | 0.39 | 0.39 | 0.92 | 0.92 | 0.92 | 0.92 | 1.00 | 0.99 |
| BPSS0111 | T6SS-5 | 0.53 | 0.53 | 0.96 | 0.96 | 0.96 | 0.95 | 1.00 | 1.00 |
| BPSS0112 | T6SS-5 | 0.65 | 0.66 | 0.99 | 0.99 | 0.99 | 0.99 | 1.00 | 1.00 |
| BPSS0113 | T6SS-5 | 0.43 | 0.43 | 0.93 | 0.93 | 0.93 | 0.93 | 1.00 | 1.00 |
| BPSS0114 | T6SS-5 | 0.37 | 0.36 | 0.90 | 0.90 | 0.90 | 0.90 | 1.00 | 1.00 |
| BPSS0115 | T6SS-5 | 0.05 | 0.05 | 0.82 | 0.82 | 0.82 | 0.82 | 1.00 | 0.99 |
| BPSS0116 | T6SS-5 | 0.79 | 0.79 | 0.92 | 0.92 | 0.92 | 0.92 | 1.00 | 1.00 |
| BPSS0117 | T6SS-5 | 0.85 | 0.14 | 0.87 | 0.87 | 0.87 | 0.87 | 1.00 | 1.00 |

Table S2. Pairwise matrix of 16S rRNA sequence percent identity and SNPs. Top half of matrix lists the number of SNPs and the bottom half of the matrix lists the percent identity of the 16S rRNA gene sequences. Species: Bma, *Burkholderia mallei*; Bp, *B. pseudomallei*; Bt, *B. thailandensis*; Bo, *B. oklahomensis*; Bh, *B. humptydoensis*; Bm, *B. mayonis* sp. nov.; Bs, *B. savannae* sp. nov.; Bsi, *B. singularis*; Bu, *B. ubonensis*.

|                  | Bo E0 | Bo E0 | Bo C6 | Bu MS | Bu MS | Bu MS | Bs B | Bs MS | Bs MS | Bs B | Bs MS | Bsi MS | B m | B m | B m | B m | Bma AT | Bma AT | Bp K9 | Bp K9 | Bh MS | Bt E2 | Bh MS |
|------------------|-------|-------|-------|-------|-------|-------|------|-------|-------|------|-------|--------|-----|-----|-----|-----|--------|--------|-------|-------|-------|-------|-------|
|                  | 14    | 14    | 78    | M     | M     | M     | D    | MB    | MB    | D    | MB    | MB     | B   | B   | B   | B   | CC2    | CC2    | 62    | 62    | M     | 64    | M     |
|                  | 7     | 7     | 6     | B2    | B2    | B2    | U1   | 266   | 852   | U1   | 266   | 715    | D   | D   | D   | D   | 334    | 334    | 43    | 43    | B4    |       | B4    |
|                  | co    | co    |       | 2     | 2     | 2     | 9    | copi  | copi  | 8    | copi  |        | U6  | U6  | U8  | U8  | 4      | 4      | co    | co    | 3     |       | 3     |
|                  | py    | py    |       | cop   | cop   | cop   |      | es1,  | es    | co   | es2-  |        | co  | co  | co  | co  | copy   | copy   | py    | py    | cop   |       | cop   |
|                  | 1     | 2     |       | y3    | y1    | y2    |      | 4     | 1-4   | pie  | s     |        | py  | pie | pie | py  | 2      | 1      | 1     | 2     | y2    |       | y1    |
|                  |       |       |       |       |       |       |      |       |       | 1-4  |       |        |     |     | 3   |     |        |        |       |       |       |       |       |
| Bo E0147 copy1   | ■     | 5     | 2     | 33    | 31    | 32    | 22   | 22    | 22    | 23   | 23    | 30     | 24  | 23  | 21  | 22  | 25     | 24     | 24    | 23    | 26    | 23    | 27    |
| Bo E0147 copy2   | 99.7  | ■     | 3     | 31    | 29    | 30    | 20   | 20    | 20    | 21   | 21    | 30     | 24  | 23  | 19  | 20  | 24     | 23     | 23    | 22    | 25    | 21    | 25    |
| Bo C6786         | 99.9  | 99.8  | ■     | 31    | 29    | 30    | 20   | 20    | 20    | 21   | 21    | 28     | 24  | 23  | 19  | 20  | 23     | 22     | 22    | 21    | 24    | 21    | 25    |
| Bu MSMB2 2 copy3 | 97.8  | 98.0  | 98.0  | ■     | 2     | 3     | 22   | 24    | 24    | 23   | 23    | 29     | 31  | 32  | 34  | 35  | 27     | 26     | 24    | 25    | 21    | 26    | 26    |
| Bu MSMB2 2 copy1 | 98.0  | 98.1  | 98.1  | 99.9  | ■     | 1     | 20   | 22    | 22    | 21   | 21    | 27     | 29  | 30  | 32  | 33  | 25     | 24     | 22    | 23    | 19    | 24    | 24    |
| Bu MSMB2 2 copy2 | 97.9  | 98.0  | 98.0  | 99.8  | 99.9  | ■     | 21   | 23    | 23    | 22   | 22    | 28     | 30  | 31  | 33  | 34  | 26     | 25     | 23    | 24    | 20    | 25    | 25    |
| Bs BDU19         | 98.6  | 98.7  | 98.7  | 98.6  | 98.7  | 98.6  | ■    | 4     | 4     | 3    | 3     | 23     | 16  | 17  | 20  | 21  | 23     | 22     | 20    | 21    | 22    | 18    | 22    |
| Bs MSMB2 66      | 98.6  | 98.7  | 98.7  | 98.4  | 98.6  | 98.5  | 99.7 | ■     | 2     | 1    | 1     | 21     | 20  | 21  | 16  | 17  | 25     | 24     | 22    | 23    | 24    | 20    | 24    |

|                                 |      |      |      |      |      |      |      |      |      |      |      |      |      |      |      |      |      |      |    |    |    |    |    |    |
|---------------------------------|------|------|------|------|------|------|------|------|------|------|------|------|------|------|------|------|------|------|----|----|----|----|----|----|
| copies1,<br>4                   |      |      |      |      |      |      |      |      |      |      |      |      |      |      |      |      |      |      |    |    |    |    |    |    |
| Bs<br>MSMB8<br>52 copies<br>1-4 | 98.6 | 98.7 | 98.7 | 98.4 | 98.6 | 98.5 | 99.7 | 99.9 |      | 1    | 1    | 21   | 20   | 21   | 16   | 17   | 25   | 24   | 22 | 23 | 24 | 20 | 24 |    |
| Bs<br>BDU18<br>copies 1-<br>4   | 98.5 | 98.6 | 98.6 | 98.5 | 98.6 | 98.6 | 99.8 | 99.9 | 99.9 |      |      | 0    | 20   | 19   | 20   | 17   | 18   | 24   | 23 | 21 | 22 | 23 | 19 | 23 |
| Bs<br>MSMB2<br>66<br>copies2-3  | 98.5 | 98.6 | 98.6 | 98.5 | 98.6 | 98.6 | 99.8 | 99.9 | 99.9 | 10.0 |      |      | 20   | 19   | 20   | 17   | 18   | 24   | 23 | 21 | 22 | 23 | 19 | 23 |
| Bsi<br>MSMB7<br>15              | 98.0 | 98.0 | 98.2 | 98.1 | 98.2 | 98.2 | 98.5 | 98.6 | 98.6 | 98.7 | 98.7 |      |      | 27   | 28   | 26   | 27   | 17   | 16 | 14 | 15 | 31 | 22 | 27 |
| Bm<br>BDU6<br>copy1             | 98.4 | 98.4 | 98.4 | 98.0 | 98.1 | 98.0 | 99.0 | 98.7 | 98.7 | 98.8 | 98.8 | 98.2 |      |      | 1    | 12   | 13   | 20   | 19 | 17 | 18 | 29 | 14 | 19 |
| Bm<br>BDU6<br>copies2-4         | 98.5 | 98.5 | 98.5 | 97.9 | 98.0 | 98.0 | 98.9 | 98.6 | 98.6 | 98.7 | 98.7 | 98.2 | 99.9 |      |      | 11   | 12   | 19   | 18 | 18 | 17 | 28 | 13 | 18 |
| Bm<br>BDU8<br>copies1-3         | 98.6 | 98.8 | 98.8 | 97.8 | 97.9 | 97.8 | 98.7 | 99.0 | 99.0 | 98.9 | 98.9 | 98.3 | 99.2 | 99.3 |      |      | 1    | 22   | 21 | 21 | 20 | 27 | 12 | 19 |
| Bm<br>BDU8<br>copy4             | 98.6 | 98.7 | 98.7 | 97.7 | 97.8 | 97.8 | 98.6 | 98.9 | 98.9 | 98.8 | 98.8 | 98.2 | 99.1 | 99.2 | 99.9 |      |      | 23   | 22 | 22 | 21 | 28 | 13 | 20 |
| Bma<br>ATCC23<br>344<br>copy2   | 98.4 | 98.4 | 98.5 | 98.2 | 98.4 | 98.3 | 98.5 | 98.4 | 98.4 | 98.4 | 98.4 | 98.9 | 98.7 | 98.8 | 98.6 | 98.5 |      |      | 1  | 3  | 2  | 26 | 14 | 17 |
| Bma<br>ATCC23<br>344<br>copy1   | 98.4 | 98.5 | 98.6 | 98.3 | 98.4 | 98.4 | 98.6 | 98.4 | 98.4 | 98.5 | 98.5 | 99.0 | 98.8 | 98.8 | 98.6 | 98.6 | 99.9 |      |    | 2  | 1  | 25 | 13 | 16 |
| Bp<br>K96243<br>copy1           | 98.4 | 98.5 | 98.6 | 98.4 | 98.6 | 98.5 | 98.7 | 98.6 | 98.6 | 98.6 | 98.6 | 99.1 | 98.9 | 98.8 | 98.6 | 98.6 | 99.8 | 99.9 |    |    | 1  | 25 | 13 | 16 |

|                        |          |          |          |          |          |          |          |          |          |          |          |          |          |          |          |          |      |      |          |          |          |          |    |
|------------------------|----------|----------|----------|----------|----------|----------|----------|----------|----------|----------|----------|----------|----------|----------|----------|----------|------|------|----------|----------|----------|----------|----|
| Bp<br>K96243<br>copy2  | 98<br>.5 | 98.<br>6 | 98.<br>6 | 98.<br>4 | 98.<br>5 | 98.<br>4 | 98.<br>6 | 98.<br>5 | 98.<br>5 | 98.<br>6 | 98.<br>6 | 99.<br>0 | 98.<br>8 | 98.<br>9 | 98.<br>7 | 98.<br>6 | 99.9 | 99.9 | 99.<br>9 |          | 24       | 12       | 15 |
| Bh<br>MSMB4<br>3 copy2 | 98<br>.3 | 98.<br>4 | 98.<br>4 | 98.<br>6 | 98.<br>8 | 98.<br>7 | 98.<br>6 | 98.<br>4 | 98.<br>4 | 98.<br>5 | 98.<br>5 | 98.<br>0 | 98.<br>1 | 98.<br>2 | 98.<br>2 | 98.<br>2 | 98.3 | 98.4 | 98.<br>4 | 98.<br>4 |          | 15       | 12 |
| Bt E264                | 98<br>.5 | 98.<br>6 | 98.<br>6 | 98.<br>3 | 98.<br>4 | 98.<br>4 | 98.<br>8 | 98.<br>7 | 98.<br>7 | 98.<br>8 | 98.<br>8 | 98.<br>6 | 99.<br>1 | 99.<br>1 | 99.<br>2 | 99.<br>1 | 99.1 | 99.1 | 99.<br>1 | 99.<br>2 | 99.<br>0 |          | 7  |
| Bh<br>MSMB4<br>3 copy1 | 98<br>.2 | 98.<br>4 | 98.<br>4 | 98.<br>3 | 98.<br>4 | 98.<br>4 | 98.<br>6 | 98.<br>4 | 98.<br>4 | 98.<br>5 | 98.<br>5 | 98.<br>2 | 98.<br>8 | 98.<br>8 | 98.<br>8 | 98.<br>7 | 98.9 | 99.0 | 99.<br>0 | 99.<br>0 | 99.<br>2 | 99.<br>5 |    |

Table S3. List of the 66 assemblies used to construct the WGS phylogeny for Figure 1.

| <b>NCBI assembly accession number</b> | <b><i>Burkholderia species</i></b> | <b>Strain ID</b>  | <b>Assembly type</b> |
|---------------------------------------|------------------------------------|-------------------|----------------------|
| GCA_001522635.2                       | <i>B. mayonis</i> sp. nov.         | BDU8              | Complete             |
| GCA_001523745.2                       | <i>B. mayonis</i> sp. nov.         | BDU6              | Complete             |
| GCA_001462435.1                       | <i>B. humptydooensis</i>           | MSMB122           | Chromosome           |
| GCA_002888035.1                       | <i>B. humptydooensis</i>           | MSMB121           | Contig               |
| GCA_002888095.1                       | <i>B. humptydooensis</i>           | MSMB122           | Contig               |
| GCA_000170355.1                       | <i>B. oklahomensis</i>             | EO147             | Contig               |
| GCA_000755985.1                       | <i>B. oklahomensis</i>             | EO147             | Complete             |
| GCA_001522105.2                       | <i>B. oklahomensis</i>             | EO147             | Complete             |
| GCA_000170375.1                       | <i>B. oklahomensis</i>             | C6786             | Contig               |
| GCA_001522135.2                       | <i>B. oklahomensis</i>             | C6786             | Complete             |
| GCA_000959365.1                       | <i>B. oklahomensis</i>             | C6786             | Complete             |
| GCA_900608545.1                       | <i>B. oklahomensis</i>             | LMG_23618         | Contig               |
| GCA_900446275.1                       | <i>B. oklahomensis</i>             | NCTC13388         | Contig               |
| GCA_000011545.1                       | <i>B. pseudomallei</i>             | K96243            | Complete             |
| GCA_001524445.2                       | <i>B. savannae</i> sp. nov.        | MSMB0266          | Complete             |
| GCA_001546955.1                       | <i>B. savannae</i> sp. nov.        | BDU19             | Contig               |
| GCA_001546915.1                       | <i>B. savannae</i> sp. nov.        | BDU18             | Contig               |
| GCA_001524625.2                       | <i>B. savannae</i> sp. nov.        | MSMB0852          | Complete             |
| GCA_001523725.1                       | <i>B. singularis</i>               | TSV85             | Contig               |
| GCA_900176645.1                       | <i>B. singularis</i>               | LMG_28154         | Contig               |
| GCA_000012365.1                       | <i>B. thailandensis</i>            | E264              | Complete             |
| GCA_000567925.1                       | <i>B. thailandensis</i>            | 2002721723        | Complete             |
| GCA_002588555.1                       | <i>B. thailandensis</i>            | FDAARGOS_425      | Contig               |
| GCA_002888235.1                       | <i>B. thailandensis</i>            | 2002721723        | Contig               |
| GCA_000959425.1                       | <i>B. thailandensis</i>            | 2002721643        | Complete             |
| GCA_002891195.1                       | <i>B. thailandensis</i>            | FDAARGOS_240      | Contig               |
| GCA_002891115.1                       | <i>B. thailandensis</i>            | FDAARGOS_236      | Contig               |
| GCA_003568605.1                       | <i>B. thailandensis</i>            | E264              | Complete             |
| GCA_000152285.1                       | <i>B. thailandensis</i>            | E264              | Chromosome           |
| GCA_002888315.1                       | <i>B. thailandensis</i>            | 2002721643        | Contig               |
| GCA_000567945.1                       | <i>B. thailandensis</i>            | E444              | Complete             |
| GCA_002888205.1                       | <i>B. thailandensis</i>            | E0444             | Contig               |
| GCA_003614835.1                       | <i>B. thailandensis</i>            | FDAARGOS          | Complete             |
| GCA_000706745.1                       | <i>B. thailandensis</i>            | USAMRU_Malaysia20 | Complete             |
| GCA_001555555.1                       | <i>B. thailandensis</i>            | Malaysia20        | Contig               |
| GCA_003614815.1                       | <i>B. thailandensis</i>            | FDAARGOS_241      | Complete             |
| GCA_000877335.1                       | <i>B. thailandensis</i>            | Phuket4W1         | Scaffold             |

|                 |                         |              |          |
|-----------------|-------------------------|--------------|----------|
| GCA_002888355.1 | <i>B. thailandensis</i> | Phuket4W1    | Contig   |
| GCA_003020025.1 | <i>B. thailandensis</i> | FDAARGOS_237 | Complete |
| GCA_000765375.1 | <i>B. thailandensis</i> | E254         | Complete |
| GCA_002891095.1 | <i>B. thailandensis</i> | FDAARGOS_244 | Contig   |
| GCA_002888335.1 | <i>B. thailandensis</i> | E254         | Contig   |
| GCA_000170395.1 | <i>B. thailandensis</i> | Bt4          | Contig   |
| GCA_000764595.1 | <i>B. thailandensis</i> | MSMB59       | Complete |
| GCA_001718595.1 | <i>B. thailandensis</i> | MSMB59       | Complete |
| GCA_001524345.1 | <i>B. thailandensis</i> | MSMB60       | Contig   |
| GCA_001524325.1 | <i>B. thailandensis</i> | E1           | Contig   |
| GCA_000170315.1 | <i>B. thailandensis</i> | TXDOH        | Contig   |
| GCA_000808035.2 | <i>B. thailandensis</i> | 2003015869   | Complete |
| GCA_001718295.1 | <i>B. thailandensis</i> | 2003015869   | Complete |
| GCA_002888425.1 | <i>B. thailandensis</i> | TXDOH        | Contig   |
| GCA_000179515.1 | <i>B. thailandensis</i> | E555         | Contig   |
| GCA_002803565.1 | <i>B. thailandensis</i> | 2_1          | Contig   |
| GCA_000567905.1 | <i>B. thailandensis</i> | H0587        | Complete |
| GCA_002888395.1 | <i>B. thailandensis</i> | H0587        | Contig   |
| GCA_003020185.1 | <i>B. thailandensis</i> | FDAARGOS_238 | Complete |
| GCA_001718615.1 | <i>B. thailandensis</i> | 2002721121   | Complete |
| GCA_000959605.1 | <i>B. thailandensis</i> | 34           | Complete |
| GCA_002891155.1 | <i>B. thailandensis</i> | FDAARGOS_243 | Contig   |
| GCA_001718635.1 | <i>B. thailandensis</i> | 2002721643   | Complete |
| GCA_001555485.1 | <i>B. thailandensis</i> | 2002721621   | Contig   |
| GCA_000170495.1 | <i>B. thailandensis</i> | MSMB43       | Contig   |
| GCA_000266985.1 | <i>B. thailandensis</i> | MSMB43       | Scaffold |
| GCA_000385525.1 | <i>B. thailandensis</i> | MSMB121      | Complete |
| GCA_002386205.1 | <i>B. thailandensis</i> | FDAARGOS_426 | Complete |
| GCA_000959245.1 | <i>B. ubonensis</i>     | MSMB22       | Complete |

## References

1. Mellmann A, Cloud J, Maier T, Keckevoet U, Ramminger I, Iwen P, Dunn J, Hall G, Wilson D, LaSala P, Kostrzewa M, Harmsen D. 2008. Evaluation of matrix-assisted laser desorption ionization-time-of-flight mass spectrometry in comparison to 16S rRNA gene sequencing for species identification of nonfermenting bacteria. *Journal of Clinical Microbiology* 46:1946-1954.
2. Sahl JW, Vazquez AJ, Hall CM, Busch JD, Tuanyok A, Mayo M, Schupp JM, Lummis M, Pearson T, Shippy K, Colman RE, Allender CJ, Theobald V, Sarovich DS, Price EP, Hutcheson A, Korlach J, LiPuma JJ, Ladner J, Lovett S, Koroleva G, Palacios G, Limmathurotsakul D, Wuthiekanun V, Wongsuwan G, Currie BJ, Keim P, Wagner DM. 2016. The Effects of Signal Erosion and Core Genome Reduction on the Identification of Diagnostic Markers. *mBio* 7:e00846-16. <https://doi.org/10.1128/mBio.00846-16>.
